# Supplementary material for: Graph-based autoencoder integrates spatial transcriptomics with chromatin images and identifies joint biomarkers for Alzheimer’s disease
Source: PubMed Central journal article supplement (PMC9719477; doi:10.1038/s41467-022-35233-1), 2022-12-03
Supplement: 41467_2022_35233_MOESM4_ESM.pdf [file 41467_2022_35233_MOESM4_ESM.pdf]

**Title: Supplementary Data 1.**

**Description: Classification loss of plaque size regression as fraction of misclassified cells.** The classification error for each of the regression models was calculated as described in Methods.
